# Supplementary material for: Isolation and Screening of Indigenous Plant Growth-promoting Rhizobacteria from Different Rice Cultivars in Afghanistan Soils
Source: PubMed Central journal article supplement (PMC6934389; doi:10.1264/jsme2.me18168), 2019-12-27
Supplement: 34_347_s1.pdf [file 34_347_s1.pdf]

**Table 2** (Supplementary)

| Rice varieties | Isolate name | Soil sampling site | Fields  | Origin of isolates associated with | Closest relative based on 16S rRNA gene <sup>†</sup> | IAA production <sup>a</sup> | ARA <sup>b</sup> | <sup>c</sup> P-solubilization | <sup>d</sup> K-solubilization | <sup>e</sup> S-production | Accession Numbers |
|----------------|--------------|--------------------|---------|------------------------------------|------------------------------------------------------|-----------------------------|------------------|-------------------------------|-------------------------------|---------------------------|-------------------|
|                | AF1          | Baghlan            | Paddy   | Leaf                               | <i>Agrobacterium larrymoorei</i> (99%)               | 14.5±0.7                    | 0.0              | 1.0±0.1                       | 0.0                           | 0.0                       | LC015599          |
|                | AF5          | Baghlan            | Paddy   | Leaf                               | <i>Pseudomonas brassicacearum</i> * (100%)           | 8.4±0.2                     | 2.9±0.1          | 0.0                           | 0.0                           | 6.0±0.8                   | LC015569          |
|                | AF19         | Baghlan            | Paddy   | Leaf                               | <i>Rhizobium daejeonense</i> (99%)                   | 10.9±0.3                    | 2.7±0.2          | 0.0                           | 0.0                           | 3.0±0.2                   | LC015583          |
|                | AF21         | Badakhshan         | Alfalfa | Leaf                               | N.D.                                                 | 0.0                         | 1.3±0.0          | 0.0                           | 0.0                           | 0.0                       | N.D.              |
|                | AF27         | Takhar             | Paddy   | Leaf                               | <i>Microbacterium testaceum</i> (99%)                | 7.3±0.1                     | 0.0              | 1.0±0.1                       | 0.0                           | 0.0                       | LC015552          |
|                | AF28         | Baghlan            | Paddy   | Leaf                               | <i>Agrobacterium larrymoorei</i> (99%)               | 4.2±0.1                     | 0.0              | 1.0±0.2                       | 0.0                           | 1.0±0.1                   | LC015600          |
|                | AF57         | Baghlan            | Paddy   | Leaf                               | N.D.                                                 | 5.6±0.3                     | 0.2±0.1          | 0.0                           | 0.0                           | 0.0                       | N.D.              |
|                | AF80         | Kabul              | Clover  | Leaf                               | <i>Microbacterium testaceum</i> (99%)                | 5.9±0.4                     | 0.0              | 1.5±0.4                       | 0.0                           | 0.0                       | LC015554          |
| Leaf star      | AF95         | Takhar             | Paddy   | Leaf                               | <i>Pseudomonas straminea</i> (100%)                  | 5.3±0.2                     | 5.0±0.2          | 0.0                           | 0.0                           | 7.0±0.5                   | LC015565          |
|                | AF113        | Baghlan            | Paddy   | Leaf                               | <i>Acidovorax oryzae</i> (100%)                      | 2.8±0.4                     | 0.0              | 3.0±0.1                       | 0.0                           | 6.0±0.8                   | LC015530          |
|                | AF52         | Takhar             | Paddy   | Root                               | <i>Agrobacterium larrymoorei</i> (99%)               | 9.4±1.6                     | 0.0              | 1.1±0.1                       | 0.0                           | 0.0                       | LC015601          |
|                | AF62         | Badakhshan         | Alfalfa | Root                               | N.D.                                                 | 9.5±1.0                     | 0.3±0.0          | 1.2±0.3                       | 0.0                           | 0.0                       | N.D.              |
|                | AF70         | Takhar             | Paddy   | Root                               | <i>Pseudomonas monteilii</i> (100%)                  | 17.7±0.4                    | 0.0              | 0.0                           | 0.0                           | 5.0±0.9                   | LC015566          |
|                | AF71         | Badakhshan         | Alfalfa | Root                               | <i>Paenibacillus pabuli</i> (99 %)                   | 4.2±0.7                     | 0.0              | 0.0                           | 0.0                           | 5.0±0.7                   | LC015557          |
|                | AF78         | Baghlan            | Paddy   | Root                               | <i>Pseudomonas brassicacearum</i> * (99%)            | 10.5±2.1                    | 0.0              | 0.0                           | 0.0                           | 0.0                       | LC015568          |
|                | AF87         | Badakhshan         | Paddy   | Root                               | <i>Rhizobium daejeonense</i> (99%)                   | 14.8±0.5                    | 0.1±0.0          | 1.1±0.3                       | 0.0                           | 0.0                       | LC015588          |
|                | AF90         | Kunduz             | Paddy   | Root                               | <i>Variovorax paradoxus</i> (100%)                   | 3.2±0.5                     | 0.0              | 0.0                           | 1.0 ± 0.2                     | 1.0 ± 0.0                 | LC015538          |
|                | AF17         | Baghlan            | Paddy   | Root                               | <i>Acidovorax avenae</i> (100%)                      | 0.0                         | 0.0              | 1.5±0.3                       | 0                             | 4.0±0.5                   | LC015533          |
|                | AF9          | Kunduz             | Paddy   | Leaf                               | <i>Pantoea ananatis</i> (100%)                       | 22.5±1.2                    | 3.4±0.3          | 2.5±0.1                       | 4.0 ± 0.5                     | 1.0±0.2                   | LC015551          |
|                | AF10         | Baghlan            | Paddy   | Leaf                               | <i>Xanthomonas sacchari</i> (100%)                   | 8.0±0.9                     | 0.0              | 0.0                           | 0.0                           | 0.0                       | LC015604          |
|                | AF11         | Baghlan            | Paddy   | Leaf                               | <i>Rhizobium rosettiformans</i> (99%)                | 11.7±2.2                    | 0.5±0.0          | 0.0                           | 0.0                           | 0.0                       | LC015582          |
|                | AF16         | Kunduz             | Paddy   | Leaf                               | <i>Xanthomonas sacchari</i> (99%)                    | 6.8±0.8                     | 0.0              | 0.0                           | 0.0                           | 1.0±0.1                   | LC015607          |
|                | AF22         | Badakhshan         | Paddy   | Leaf                               | <i>Pseudomonas resinovorans</i> (99%)                | 3.9±0.9                     | 0.2±0.0          | 0.0                           | 0.0                           | 0.0                       | LC015561          |
| Sorkhaq        | AF23         | Takhar             | Paddy   | Leaf                               | <i>Brevundimonas bullata</i> (99%)                   | 30.5±2.7                    | 2.3±0.2          | 0.0                           | 0.0                           | 0.0                       | LC015540          |
|                | AF33         | Baghlan            | Paddy   | Leaf                               | N.D.                                                 | 9.2±3.1                     | 1.3±0.2          | 0.0                           | 0.0                           | 2.0±0.4                   | N.D.              |
|                | AF39         | Kabul              | Clover  | Leaf                               | <i>Acidovorax oryza</i> (100%)                       | 3.2±1.1                     | 3.2±0.2          | 0.0                           | 0.0                           | 3.0±0.4                   | LC015531          |
|                | AF84         | Baghlan            | Paddy   | Leaf                               | <i>Rhizobium daejeonense</i> (99%)                   | 17.4±2.6                    | 629.1±23.8       | 0.0                           | 0.0                           | 0.0                       | LC015590          |
|                | AF118        | Badakhshan         | Alfalfa | Leaf                               | N.D.                                                 | 0.0                         | 0.0              | 1.3±0.1                       | 0.0                           | 0.0                       | N.D.              |
|                | AF136        | Kabul              | Clover  | Leaf                               | N.D.                                                 | 5.0±0.8                     | 4.4±0.1          | 0.0                           | 0.0                           | 0.0                       | N.D.              |

|            |       |            |        |      |                                            |          |            |         |         |         |          |
|------------|-------|------------|--------|------|--------------------------------------------|----------|------------|---------|---------|---------|----------|
|            | AF137 | Kabul      | Clover | Leaf | <i>Pseudomonas putida</i> (100%)           | 15.8±1.5 | 647.4±27.4 | 1.0±0.1 | 1.0±0.1 | 0.0     | LC015575 |
|            | AF3   | Baghlan    | Paddy  | Root | N.D.                                       | 0.0      | 0.0        | 0.0     | 0.0     | 0.0     | N.D.     |
|            | AF13  | Baghlan    | Paddy  | Root | <i>Enterobacter ludwigii</i> (99%)         | 36.9±2.1 | 0.1±0.0    | 1.0±0.2 | 6.0±0.5 | 1.0±0.1 | LC015543 |
|            | AF15  | Kunduz     | Paddy  | Root | <i>Xanthomonas sacchari</i> (99%)          | 7.4±0.9  | 0.0        | 0.0     | 0.0     | 2.0±0.3 | LC015606 |
|            | AF42  | Badakhshan | Paddy  | Root | <i>Enterobacter ludwigii</i> (99%)         | 17.1±0.4 | 3.9±0.1    | 2.0±0.2 | 2.0±0.1 | 1.0±0.1 | LC015545 |
|            | AF50  | Badakhshan | Paddy  | Root | <i>Xanthomonas sacchari</i> (99%)          | 7.5±2.2  | 0.0        | 0.0     | 0.0     | 2.0±0.2 | LC015602 |
|            | AF91  | Baghlan    | Paddy  | Root | <i>Paenibacillus bracinonensis</i> (99%)   | 0.0      | 0.3±0.0    | 1.5±0.3 | 0.0     | 0.0     | LC015555 |
|            | AF115 | Baghlan    | Paddy  | Root | N.D.                                       | 0.0      | 0.0        | 0.0     | 2.0±0.3 | 0.0     | N.D.     |
|            | AF117 | Baghlan    | Paddy  | Root | <i>Paenibacillus barcinonensis</i> (99%)   | 0.0      | 0.5±0.0    | 0.0     | 0.0     | 0.0     | LC015556 |
|            | AF74  | Badakhshan | Paddy  | Root | <i>Enterobacter ludwigii</i> (99%)         | 18.8±1.0 | 0.3±0.0    | 2.0±0.2 | 4.2±0.7 | 3.0±0.5 | LC015546 |
|            | AF127 | Baghlan    | Paddy  | Root | N.D.                                       | 11.4±1.6 | 1.8±0.0    | 1.0±0.1 | 5.0±0.7 | 0.0     | N.D.     |
|            | AF135 | Kabul      | Clover | Root | <i>Enterobacter ludwigii</i> (100%)        | 74.9±4.7 | 0.5±0.0    | 1.5±0.4 | 0.0     | 2.0±0.3 | LC015542 |
|            | AF6   | Baghlan    | Paddy  | Leaf | <i>Agrobacterium tumefaciens</i> (99%)     | 16.5±0.9 | 0.0        | 1.0±0.3 | 0.0     | 0.0     | LC015597 |
|            | AF20  | Baghlan    | Paddy  | Leaf | <i>Rhizobium daejeonense</i> (99%)         | 10.0±1.4 | 16.7±2.1   | 1.2±0.2 | 0.0     | 0.0     | LC015584 |
|            | AF24  | Takhar     | Paddy  | Leaf | N.D.                                       | 8.8±0.3  | 0.0        | 0.0     | 0.0     | 0.0     | N.D.     |
|            | AF25  | Takhar     | Paddy  | Leaf | <i>Anchrobacter xylosoxidans</i> (99%)     | 6.6±0.5  | 2.8±0.1    | 0.0     | 0.0     | 0.0     | LC015528 |
|            | AF100 | Takhar     | Paddy  | Leaf | <i>Pseudomonas chengduensis</i> (99%)      | 0.0      | 0.0        | 0.0     | 0.0     | 6.0±0.7 | LC015559 |
|            | AF51  | Takhar     | Paddy  | Leaf | <i>Rhizobium daejeonense</i> (99%)         | 10.6±1.0 | 363.3±11.4 | 1.0±0.1 | 0.0     | 0.0     | LC015586 |
|            | AF69  | Takhar     | Paddy  | Leaf | <i>Ensifer adhaerens</i> (99%)             | 2.0±1.0  | 0.0        | 0.0     | 0.0     | 0.0     | LC015581 |
|            | AF73  | Takhar     | Paddy  | Leaf | <i>Pseudomonas putida</i> (100%)           | 7.4±0.8  | 14.1±1.1   | 1.5±0.4 | 0.0     | 6.5±0.4 | LC015579 |
|            | AF79  | Kunduz     | Paddy  | Leaf | <i>Enterobacter ludwigii</i> (99%)         | 47.4±3.0 | 0.4±0.1    | 1.0±0.1 | 0.0     | 1.0±0.1 | LC015547 |
|            | AF83  | Baghlan    | Paddy  | Leaf | N.D.                                       | 13.9±0.6 | 0.6±0.0    | 0.0     | 3.0±0.8 | 1.0±0.3 | N.D.     |
|            | AF86  | Baghlan    | Paddy  | Leaf | <i>Pseudomonas brassicacearum</i> * (100%) | 10.0±2.4 | 0.8±0.0    | 0.0     | 0.0     | 6.0±0.9 | LC015572 |
| Bala Doshi | AF7   | Baghlan    | Paddy  | Root | <i>Ralstonia insidiosus</i> (100%)         | 2.7±0.4  | 2.8±0.2    | 0.0     | 0.0     | 0.0     | LC015529 |
|            | AF8   | Takhar     | Paddy  | Root | <i>Rhizobium borbori</i> (99%)             | 6.5±0.8  | 1.5±0.4    | 0.0     | 0.0     | 1.0±0.1 | LC015592 |
|            | AF30  | Takhar     | Paddy  | Root | <i>Rhizobium daejeonense</i> (99%)         | 12.3±0.4 | 96.3±6.5   | 0.0     | 0.0     | 0.0     | LC015585 |
|            | AF31  | Baghlan    | Paddy  | Root | <i>Pseudomonas oryzihabitans</i> (99%)     | 36.9±1.2 | 0.71±0.1   | 0.0     | 0.0     | 0.0     | LC015573 |
|            | AF32  | Kunduz     | Paddy  | Root | <i>Enterobacter ludwigii</i> (99%)         | 23.6±2.6 | 0.0        | 1.3±0.4 | 4.0±0.9 | 0.0     | LC015544 |
|            | AF43  | Takhar     | Paddy  | Root | <i>Pseudomonas mosselii</i> (100%)         | 7.6±0.8  | 0.0        | 5.0±0.6 | 0.0     | 3.0±0.5 | LC015563 |
|            | AF46  | Baghlan    | Paddy  | Root | <i>Pseudomonas brassicacearum</i> * (99%)  | 3.1±1.8  | 16.0±0.9   | 0.0     | 0.0     | 6.0±0.3 | LC015571 |
|            | AF55  | Takhar     | Paddy  | Root | <i>Acidovorax facilis</i> (99%)            | 4.1±1.5  | 0.3±0.0    | 0.0     | 0.0     | 0.0     | LC015537 |
|            | AF66  | Badakhshan | Paddy  | Root | <i>Acidovorax facilis</i> (99%)            | 2.4±0.5  | 0.0        | 0.0     | 0.0     | 0.0     | LC015536 |
|            | AF76  | Takhar     | Paddy  | Root | <i>Pseudomonas putida</i> (100%)           | 9.9±1.4  | 1.0±0.1    | 0.0     | 0.0     | 7.0±0.9 | LC015578 |
|            | AF77  | Baghlan    | Paddy  | Root | N.D.                                       | 2.1±0.6  | 0.2±0.0    | 0.9±0.2 | 0.0     | 0.0     | N.D.     |

|                  |       |            |         |        |                                           |                                 |            |         |         |         |           |
|------------------|-------|------------|---------|--------|-------------------------------------------|---------------------------------|------------|---------|---------|---------|-----------|
|                  | AF96  | Takhar     | Paddy   | Root   | <i>Pseudomonas putida</i> (100%)          | 7.8±1.4                         | 0.0        | 1.2±0.5 | 2.0±0.3 | 6.0±0.4 | LC015580  |
|                  | AF97  | Badakhshan | Paddy   | Root   | N.D.                                      | 2.9±0.7                         | 0.0        | 0.0     | 3.0±0.5 | 0.0     | N.D.      |
|                  | AF98  | Baghlan    | Paddy   | Root   | N.D.                                      | 5.7±0.3                         | 0.0        | 1.5±0.3 | 4.0±1.0 | 0.0     | N.D.      |
|                  | AF99  | Kunduz     | Paddy   | Root   | <i>Pseudomonas oryzihabitans</i> (99%)    | 6.5±0.6                         | 1.0±0.0    | 0.0     | 0       | 4.0±0.9 | LC015574  |
|                  | AF108 | Baghlan    | Paddy   | Root   | <i>Pseudomonas putida</i> (100%)          | 0.0                             | 0.0        | 1.5±0.2 | 2.0±0.2 | 0.0     | LC015577  |
|                  | AF130 | Baghlan    | Paddy   | Root   | <i>Brevundimonas diminuta</i> (99%)       | 3.2±1.8                         | 1.2 ± 0.0  | 0.0     | 0.0     | 0.0     | LC015539  |
|                  | AF36  | Badakhshan | Paddy   | Leaf   | <i>Pseudoxanthomonas mexicana</i> (100%)  | 2.4±0.2                         | 16.9±0.9   | 1.1±0.1 | 0.0     | 0.0     | LC015562  |
|                  | AF54  | Badakhshan | Paddy   | Leaf   | <i>Xanthomonas sacchari</i> (99%)         | 5.5±0.4                         | 0.0        | 0.0     | 0.0     | 0.0     | LC015609  |
|                  | AF60  | Badakhshan | Paddy   | Leaf   | <i>Microbacterium testaceum</i> (99%)     | 3.2±0.2                         | 0.0        | 1.0±0.1 | 0.0     | 0.0     | LC015553  |
|                  | AF112 | Badakhshan | Alfalfa | Leaf   | <i>Pseudomonas plecoglossicida</i> (99%)  | 11.5±1.3                        | 0.3±0.0    | 2.0±0.2 | 0.0     | 0.0     | LC015560  |
|                  | AF114 | Badakhshan | Alfalfa | Leaf   | <i>Agrobacterium tumefaciens</i> (100%)   | 14.1±0.9                        | 0.0        | 0.0     | 0.0     | 0.0     | LC015594  |
| Look<br>Andarab  | AF38  | Baghlan    | Paddy   | Root   | N.D.                                      | 4.9±0.7                         | 0.0        | 0.0     | 0.0     | 2.0±0.3 | N.D.      |
|                  | AF40  | Takhar     | Paddy   | Root   | <i>Rhizobium borbori</i> (99%)            | 10.8±0.9                        | 1.7±0.2    | 0.0     | 0.0     | 0.0     | LC015591  |
|                  | AF75  | Badakhshan | Paddy   | Root   | <i>Rhizobium daejeonense</i> (99%)        | 13.5±0.7                        | 345.2±14.4 | 0.0     | 0.0     | 0.0     | LC015589  |
|                  | AF82  | Baghlan    | Paddy   | Root   | <i>Pseudomonas brassicacearum</i> * (99%) | 7.2±0.8                         | 0.9±0.0    | 0.0     | 0.0     | 5.0±0.6 | LC015567  |
|                  | AF106 | Baghlan    | Paddy   | Root   | <i>Pseudomonas putida</i> (100%)          | 12.8±1.8                        | 0.0        | 1.0±0.1 | 3.0±0.5 | 5.0±0.8 | LC015576  |
|                  | AF124 | Badakhshan | Paddy   | Root   | <i>Rhizobium daejeonense</i> (99%)        | 19.2±3.4                        | 218.3±23.5 | 0.0     | 0.0     | 0.0     | LC015587  |
|                  | AF119 | Badakhshan | Paddy   | Root   | <i>Xanthomonas sacchari</i> (99%)         | 6.7±0.4                         | 0.0        | 1.0±0.1 | 0.0     | 2.0±0.3 | LC015603  |
|                  |       | AF132      | Kabul   | Clover | Leaf                                      | <i>Acidovorax avenae</i> (100%) | 9.9±1.1    | 0.0     | 1.0±0.3 | 3.0±0.7 | 1.0 ± 0.1 |
|                  | AF134 | Kabul      | Clover  | Leaf   | <i>Enterobacter ludwigii</i> (99%)        | 92.4±5.9                        | 1.1±0.1    | 0.0     | 0.0     | 2.5±0.2 | LC015549  |
|                  | AF138 | Kabul      | Clover  | Leaf   | <i>Acidovorax avenae</i> (100%)           | 4.0±1.2                         | 0.0        | 0.0     | 0.0     | 0.0     | LC015535  |
|                  | AF26  | Takhar     | Paddy   | Root   | <i>Agrobacterium tumefaciens</i> (100%)   | 8.6±0.5                         | 0.0        | 0.0     | 1.0±0.2 | 0.0     | LC015595  |
|                  | AF29  | Badakhshan | Paddy   | Root   | <i>Xanthomonas sacchari</i> (99%)         | 8.4±2.5                         | 0.0        | 0.0     | 4.0±0.8 | 4.0±0.3 | LC015608  |
|                  | AF44  | Baghlan    | Paddy   | Root   | <i>Bacillus safensis</i> (100%)           | 3.8±0.3                         | 1.7±0.2    | 2.0±0.2 | 0.0     | 0.0     | LC015558  |
|                  | AF48  | Badakhshan | Paddy   | Root   | <i>Acidovorax oryzae</i> (100%)           | 6.4±0.7                         | 0.0        | 0.0     | 0.0     | 0.0     | LC015532  |
| Monda<br>Laghman | AF49  | Badakhshan | Alfalfa | Root   | N.D.                                      | 9.4±1.0                         | 1.1±0.3    | 0.0     | 0.0     | 0.0     | N.D.      |
|                  | AF58  | Badakhshan | Alfalfa | Root   | <i>Agrobacterium tumefaciens</i> (100%)   | 15.9±1.3                        | 0.0        | 1.0±0.1 | 0.0     | 0.0     | LC015598  |
|                  | AF59  | Badakhshan | Alfalfa | Root   | <i>Pseudoxanthomonas japonensis</i> (99%) | 7.8±0.5                         | 0.0        | 0.0     | 0.0     | 5.0±0.4 | LC015564  |
|                  | AF88  | Badakhshan | Paddy   | Root   | N.D.                                      | 0.0                             | 0.0        | 1.1±0.1 | 0.0     | 0.0     | N.D.      |
|                  | AF105 | Badakhshan | Paddy   | Root   | <i>Enterobacter ludwigii</i> (99%)        | 32.3±2.0                        | 1.2±0.1    | 0.0     | 0.0     | 0.0     | LC015541  |
|                  | AF116 | Badakhshan | Paddy   | Root   | <i>Xanthomonas sacchari</i> (100%)        | 9.5±2.0                         | 0.0        | 0.0     | 0.0     | 3.0±0.5 | LC015605  |
|                  | AF121 | Badakhshan | Alfalfa | Root   | <i>Agrobacterium tumefaciens</i> (100%)   | 13.9±1.3                        | 0.0        | 0.0     | 0.0     | 0.0     | LC015596  |
|                  | AF129 | Badakhshan | Paddy   | Root   | <i>Pseudomonas brassicacearum</i> (99%)   | 2.9±0.8                         | 3.9±0.4    | 0.0     | 0.0     | 3.0±0.2 | LC015570  |
|                  | AF133 | Kabul      | Clover  | Root   | <i>Pantoea dispersa</i> (99%)             | 35.5±2.5                        | 1.6 ± 0.0  | 0.0     | 0.0     | 1.0±0.2 | LC015550  |

|       |       |        |      |                                    |          |         |         |         |     |          |
|-------|-------|--------|------|------------------------------------|----------|---------|---------|---------|-----|----------|
| AF139 | Kabul | Clover | Root | <i>Enterobacter ludwigii</i> (99%) | 46.8±4.0 | 0.4±0.0 | 1.2±0.3 | 1.0±0.1 | 0.0 | LC015548 |
|-------|-------|--------|------|------------------------------------|----------|---------|---------|---------|-----|----------|

<sup>a</sup> Amount of IAA produced ( $\mu\text{g}$  IAA per mL per  $10^6$  cells).

<sup>b</sup> Acetylene reduction assay (ARA). Values represent activity expressed as  $\text{nmol C}_2\text{H}_4 / \text{h} / 10^6$  cells.

<sup>c</sup> Phosphate-solubilizing activity. Units represent size of clear zone (in mm) caused by dissolution of calcium phosphate.

<sup>d</sup> Potassium-solubilizing activity. Units represent size of clear zone (in mm) caused by dissolution of potassium mineral.

<sup>e</sup> Siderophore production by bacterial strains. Units represent size of orange or yellow zone (in mm).

\* *Pseudomonas brassicacearum* subsp. *brassicacearum*

<sup>f</sup> Values into parentheses indicate the percent of similarity between 16S RNA gene sequences of the isolates and those of known microorganisms of the NCBI GenBank.

N.D. means not determined
